# Supplementary material
Source: publisher site journal article supplement (https://www.spandidos-publications.com/5981/downloadSupplementary)
Supplement: Supplementary file 1 [file downloadSupplementary]

Figure S1. Target genes of mir-146a and mir-191 MiRTarBase showed the candidate targets of miR-146a-5p and miR-191-5p.

| miR-146a-5p |                |              |      | miR-191-5p |                |              |      |
|-------------|----------------|--------------|------|------------|----------------|--------------|------|
|             | Reporter assay | Western blot | qPCR |            | Reporter assay | Western blot | qPCR |
| TRAF6       | ✓              | ✓            | ✓    | TMC7       | ✓              |              | ✓    |
| BRC A1      | ✓              | ✓            | ✓    | IL1A       | ✓              |              | ✓    |
| CXCR4       | ✓              | ✓            | ✓    | SOX4       | ✓              | ✓            | ✓    |
| IRAK1       | ✓              | ✓            | ✓    | NDST1      | ✓              | ✓            | ✓    |
| NFKB1       | ✓              | ✓            | ✓    | MDM4       | ✓              |              | ✓    |
| TLR2        | ✓              | ✓            | ✓    | Cdk6       | ✓              | ✓            | ✓    |
| ROCK1       | ✓              | ✓            | ✓    | CDK6       | ✓              | ✓            | ✓    |
| TLR4        | ✓              | ✓            | ✓    | SATB1      | ✓              | ✓            | ✓    |
| EGFR        | ✓              | ✓            | ✓    | EGR1       |                | ✓            | ✓    |
| CD40LG      | ✓              | ✓            | ✓    | CCND2      |                | ✓            | ✓    |
| SMAD4       | ✓              | ✓            | ✓    | CTDSP2     |                | ✓            | ✓    |
| STAT1       | ✓              | ✓            | ✓    | LRRC8A     |                | ✓            | ✓    |
| UHRF1       | ✓              | ✓            | ✓    | SLC16A2    |                | ✓            | ✓    |
| CD80        | ✓              | ✓            | ✓    | YBX3       |                | ✓            | ✓    |
| IS2         | ✓              | ✓            | ✓    | CEBPB      | ✓              | ✓            | ✓    |
| WASF2       | ✓              | ✓            | ✓    | BASP1      | ✓              | ✓            | ✓    |
| SMN1        | ✓              | ✓            | ✓    | CDK9       | ✓              | ✓            | ✓    |
| CARD10      | ✓              | ✓            | ✓    | NOTCH2     | ✓              | ✓            | ✓    |
| COPS8       | ✓              | ✓            | ✓    | RPS6KA3    | ✓              | ✓            | ✓    |
| ELAVL1      | ✓              | ✓            | ✓    |            |                |              |      |
| NUMB        | ✓              | ✓            | ✓    |            |                |              |      |
| PRKCE       | ✓              | ✓            | ✓    |            |                |              |      |
| RAC1        | ✓              | ✓            | ✓    |            |                |              |      |
| COX2        | ✓              | ✓            | ✓    |            |                |              |      |
| CASP7       | ✓              | ✓            | ✓    |            |                |              |      |
| BCLAF1      | ✓              | ✓            | ✓    |            |                |              |      |
| NOTCH2      | ✓              | ✓            | ✓    |            |                |              |      |
| SOX2        | ✓              | ✓            | ✓    |            |                |              |      |
| LFNG        | ✓              | ✓            | ✓    |            |                |              |      |
| TGFB1       | ✓              | ✓            | ✓    |            |                |              |      |
| MIF         | ✓              | ✓            | ✓    |            |                |              |      |
| FANCM       | ✓              | ✓            | ✓    |            |                |              |      |
| NOTCH1      | ✓              | ✓            | ✓    |            |                |              |      |
| LRP2        | ✓              | ✓            | ✓    |            |                |              |      |
| CCND2       | ✓              | ✓            | ✓    |            |                |              |      |
| CCND1       | ✓              | ✓            | ✓    |            |                |              |      |
| RARB        | ✓              | ✓            | ✓    |            |                |              |      |
| PLAUR       | ✓              | ✓            | ✓    |            |                |              |      |
